# Supplementary figures and images for: Inhibition of IL-1 Signaling by Antisense Oligonucleotide-mediated Exon Skipping of IL-1 Receptor Accessory Protein (IL-1RAcP)
Source: PubMed Central journal article supplement — Mol Ther Nucleic Acids. 2013 Jan 22;2(1):e66–. doi: 10.1038/mtna.2012.58 (PMC3564974; doi:10.1038/mtna.2012.58), 2013-01-22

A

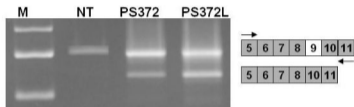

B

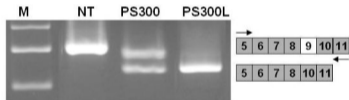

Supplement: mtna201258x1.pdf [file mtna201258x1.pdf]
